# Supplementary material for: The first fluorescent sensor for medium-chain fatty acids in water: design, synthesis and sensing properties of an organic–inorganic hybrid material
Source: Royal Society of Chemistry journal article supplement (doi:10.1039/c3tb00355h), 2013-01-01
Supplement: c3tb00355h.pdf [file c3tb00355h.pdf]

## Electronic supplementary information

### **The First Fluorescent Sensor for Medium-chain Fatty Acids in Water: Design, Synthesis and Sensing Properties of an Organic-inorganic Hybrid Material**

Rui Gong, Honglei Mu, Yimin Sun, Xiantao Fang, Peng Xue\* and Enqin Fu\*

Department of Chemistry, Hubei Key Laboratory on Organic and Polymeric Optoelectronic Materials,  
Wuhan University, Wuhan 430072, PR China

E-mail: [fueq@whu.edu.cn](mailto:fueq@whu.edu.cn) [chxuepeng@whu.edu.cn](mailto:chxuepeng@whu.edu.cn)

### Contents

**Figure S1.** The FT-IR spectrum of compound **3**.

**Figure S2.** Normalized fluorescence response  $I-I_0$  of solid **S2** in aqueous buffer solutions at (a) pH 5.80 and (b) pH 8.00 in the presence of various fatty acids.

**Figure S3.** Normalized fluorescence response  $I-I_0$  of solid **S2** in aqueous buffer solution at pH 7.16 in the presence of various fatty acids with benzoic acid together.

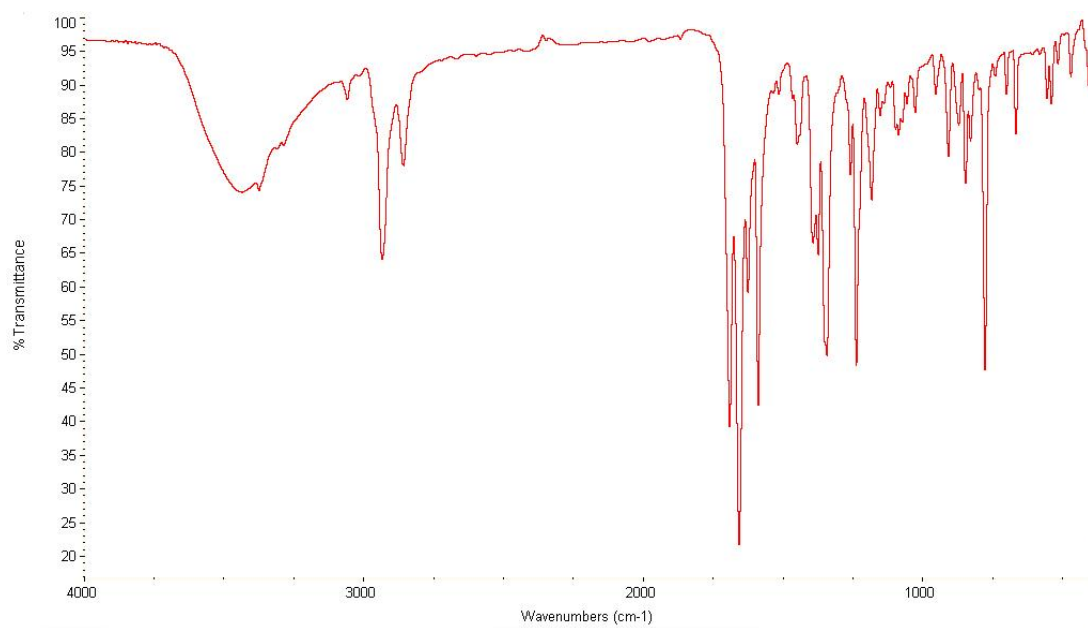

**Figure S1.** The FT-IR spectrum of compound **3**.

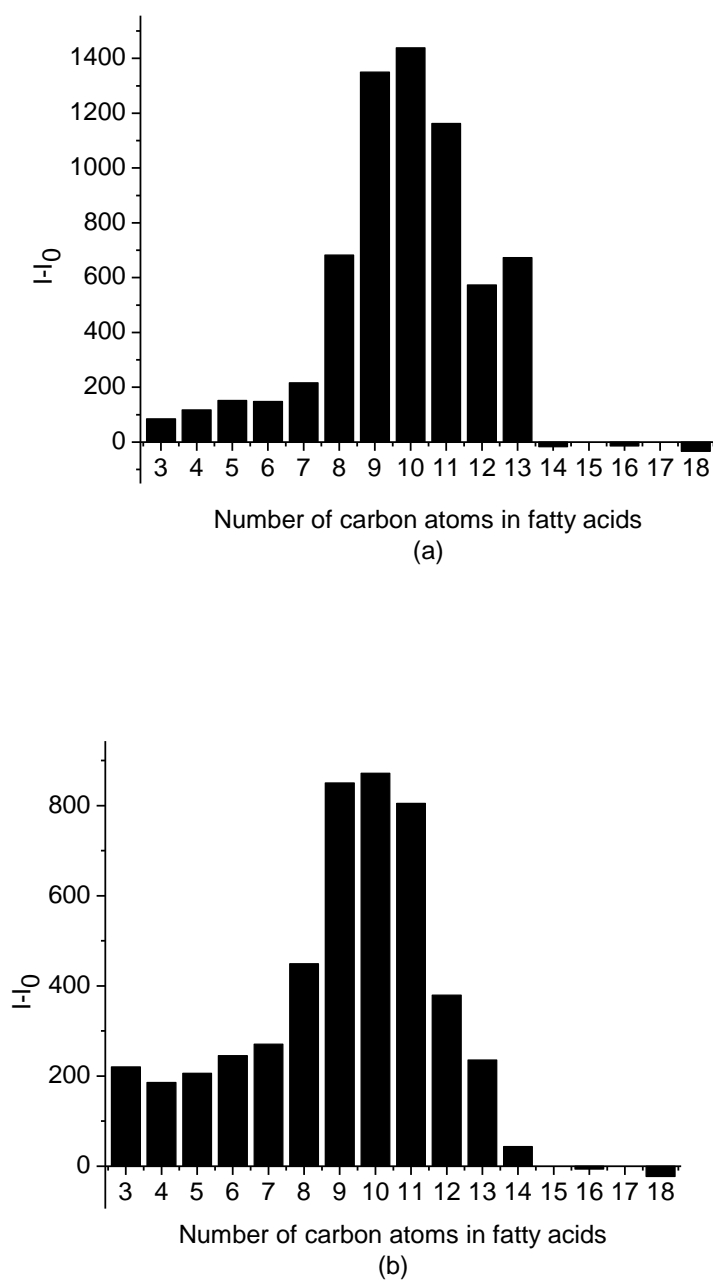

**Figure S2.** Normalized fluorescence response  $I-I_0$  of solid **S2** ( $200 \text{ mg L}^{-1}$ ,  $2.00 \text{ mL}$ ) in aqueous buffer solution at (a) pH 5.80 in the presence of various fatty acids ( $1.0 \times 10^{-1} \text{ mol L}^{-1}$ ,  $800 \text{ }\mu\text{L}$ ), and (b) pH 8.00 in the presence of various fatty acids ( $1.0 \times 10^{-1} \text{ mol L}^{-1}$ ,  $550 \text{ }\mu\text{L}$ ).  $\lambda_{\text{ex}} = 416 \text{ nm}$ .  $I_0$  corresponds to the emission of solid **S2** without aliphatic acids.

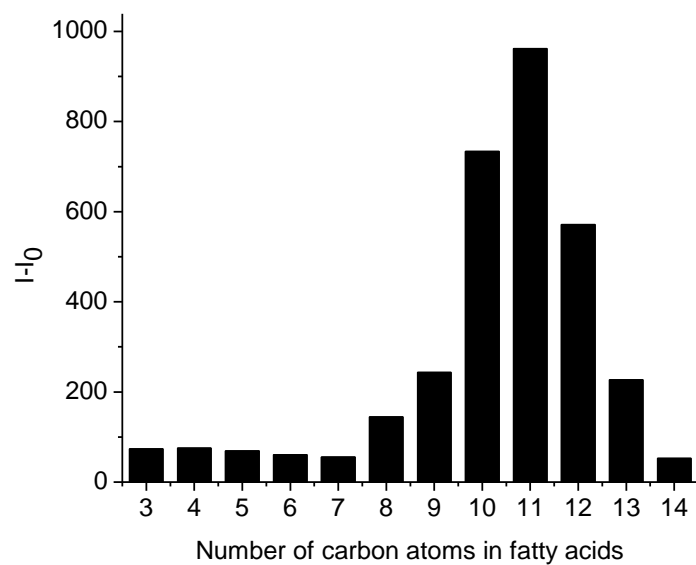

**Figure S3.** Normalized fluorescence response  $I-I_0$  of solid **S2** ( $200 \text{ mg L}^{-1}$ ,  $2.00 \text{ mL}$ ) in aqueous buffer solution at pH 7.16 in the presence of various fatty acids with benzoic acid together ( $1.0 \times 10^{-1} \text{ mol L}^{-1}$ ,  $150 \text{ }\mu\text{L}$  for both).  $\lambda_{\text{ex}} = 416 \text{ nm}$ .
